# Supplementary material for: Development of Breathable Pebax®/PEG Films for Optimization of the Shelf-Life of Fresh Agri-Food Products
Source: MDPI journal article supplement (doi:10.3390/membranes11090692), 2021-09-07
Supplement: s1 [file s1]

Supporting Information

## **Development of Breathable Pebax®/PEG Films for Optimization of the Shelf-Life of Fresh Agri-Food Products**

**Thibaut Préfol, Olivier Gain, Guillaume Sudre, Fabrice Gouanvé and Eliane Espuche \***

Univ Lyon, Université Lyon 1, CNRS UMR 5223, Ingénierie des Matériaux Polymères, F-69622 Villeurbanne, France; thibaut.prefol@hotmail.fr (T.P.); olivier.gain@univ-lyon1.fr (O.G.); guillaume.sudre@univ-lyon1.fr (G.S.); fabrice.gouanve@univ-lyon1.fr (F.G.)

\* Correspondence: eliane.espuche@univ-lyon1.fr

S1: Thermal properties of pristine Pebax® and binary Pebax®/PEG blends.

| Films                   | $T_g$ (° C) | $T_m$ PEG <sub>DME</sub><br>(° C) | $T_m$ PEG <sub>OH</sub><br>(° C) | $T_m$ PE<br>(° C) | $T_m$ PA<br>(° C) | $\Delta H_m$ PE<br>(J/g <sub>sample</sub> ) | $\Delta H_m$ PA<br>(J/g <sub>sample</sub> ) | $X_c$ PA within PA blocks<br>(%) |
|-------------------------|-------------|-----------------------------------|----------------------------------|-------------------|-------------------|---------------------------------------------|---------------------------------------------|----------------------------------|
| Pebax®                  | -55.6       | -                                 | -                                | 11.3              | 204.7             | 24.1                                        | 38.7                                        | 42.1                             |
| P/PEG <sub>OH</sub> 5   | -57.2       | -                                 | -                                | 11.2              | 201.8             | 26.7                                        | 34.5                                        | 39.5                             |
| P/PEG <sub>OH</sub> 10  | -61.1       | -                                 | -                                | 7.2               | 202.1             | 28.4                                        | 30.1                                        | 36.4                             |
| P/PEG <sub>OH</sub> 20  | -62.3       | -                                 | -                                | 6.4               | 198.6             | 31.4                                        | 26.5                                        | 36.0                             |
| P/PEG <sub>OH</sub> 30  | -72.9       | -                                 | -25.2                            | 4.6               | 194.3             | 21.2                                        | 19.3                                        | 30.0                             |
| P/PEG <sub>OH</sub> 40  | -75.5       | -                                 | -26.9                            | 4.3               | 193.7             | 22.8                                        | 15.1                                        | 27.4                             |
| P/PEG <sub>OH</sub> 50  | -78.2       | -                                 | -28.2                            | 3.2               | 190.3             | 13.8                                        | 12.4                                        | 27.0                             |
| P/PEG <sub>DME</sub> 5  | -58.1       | -                                 | -                                | 10.1              | 204.2             | 28.7                                        | 34.6                                        | 39.6                             |
| P/PEG <sub>DME</sub> 10 | -62.3       | -                                 | -                                | 9.3               | 203.8             | 32.2                                        | 32.4                                        | 39.1                             |
| P/PEG <sub>DME</sub> 20 | -72.0       | -                                 | -                                | 3.6               | 203.0             | 30.7                                        | 28.2                                        | 38.3                             |
| P/PEG <sub>DME</sub> 30 | -74.6       | -43.2                             | -                                | 2.5               | 202.3             | 25.4                                        | 23.8                                        | 35.4                             |
| P/PEG <sub>DME</sub> 40 | -82.8       | -46.0                             | -                                | -0.3              | 201.3             | 19.2                                        | 20.7                                        | 33.6                             |
| P/PEG <sub>DME</sub> 50 | -91.4       | -42.3                             | -                                | -3.3              | 200.6             | 14.2                                        | 16.5                                        | 33.2                             |

**S2: Thermal properties of ternary Pebax<sup>®</sup>/PEG blends.**

| Films                                              | $T_g$ (° C) | $T_m$ PEG <sub>DME</sub><br>(° C) | $T_m$ PEG <sub>OH</sub><br>(° C) | $T_m$ PE<br>(° C) | $T_m$ PA<br>(° C) | $\Delta H_m$ PE<br>(J/g <sub>sample</sub> ) | $\Delta H_m$ PA<br>(J/g <sub>sample</sub> ) | $X_c$ PA within PA blocks<br>(%) |
|----------------------------------------------------|-------------|-----------------------------------|----------------------------------|-------------------|-------------------|---------------------------------------------|---------------------------------------------|----------------------------------|
| P/PEG <sub>OH</sub> 2.5/PEG <sub>DME</sub> 2.5     | -56.7       | -                                 | -                                | 10.2              | 204.2             | 27.3                                        | 34.3                                        | 39.2                             |
| P/PEG <sub>OH</sub> 5/PEG <sub>DME</sub> 5         | -62.3       | -                                 | -                                | 8.6               | 202.6             | 30.5                                        | 31.0                                        | 37.4                             |
| P/PEG <sub>OH</sub> 10/PEG <sub>DME</sub> 10       | -67.2       | -                                 | -                                | 6.4               | 201.0             | 35.0                                        | 25.6                                        | 34.8                             |
| P/PEG <sub>OH</sub> 15/PEG <sub>DME</sub> 15       | -70.6       | -44.0                             | *                                | 1.1               | 198.7             | 32.4                                        | 18.3                                        | 28.4                             |
| P/PEG <sub>OH</sub> 20/PEG <sub>DME</sub> 20       | -81.9       | -45.8                             | *                                | -0.4              | 197.2             | 24.4                                        | 15.2                                        | 27.5                             |
| P/PEG <sub>OH</sub> 25/PEG <sub>DME</sub> 25       | -86.5       | -47.5                             | -                                | -1.2              | 195.5             | 20.9                                        | 12.5                                        | 27.2                             |
| P/PEG <sub>OH</sub> 1.875/PEG <sub>DME</sub> 3.125 | -58.2       | -                                 | -                                | 9.4               | 203.7             | 25.8                                        | 35.8                                        | 41.0                             |
| P/PEG <sub>OH</sub> 3.75/PEG <sub>DME</sub> 6.25   | -59.8       | -                                 | -                                | 7.7               | 203.0             | 28.5                                        | 28.3                                        | 34.2                             |
| P/PEG <sub>OH</sub> 7.5/PEG <sub>DME</sub> 12.5    | -69.6       | -                                 | -                                | 5.8               | 201.5             | 33.3                                        | 26.0                                        | 35.3                             |
| P/PEG <sub>OH</sub> 11.25/PEG <sub>DME</sub> 18.75 | -74.1       | -47.2                             | -                                | 1.7               | 199.7             | 27.2                                        | 19.4                                        | 30.1                             |
| P/PEG <sub>OH</sub> 15/PEG <sub>DME</sub> 25       | -81.8       | -42.9                             | -                                | -0.8              | 198.0             | 20.0                                        | 15.5                                        | 28.1                             |
| P/PEG <sub>OH</sub> 18.75/PEG <sub>DME</sub> 31.25 | -87.9       | -44.7                             | -                                | -1.0              | 197.0             | 16.6                                        | 12.7                                        | 27.6                             |
